# Supplementary material for: Ionicity of deep eutectic solvents by Walden plot and pulsed field gradient nuclear magnetic resonance (PFG-NMR)
Source: Royal Society of Chemistry journal article supplement (doi:10.1039/d0cp01431a), 2020-01-01
Supplement: d0cp01431a1.pdf [file d0cp01431a1.pdf]

## Supporting Information

### Ionicity of deep eutectic solvents by Walden plot and pulsed field gradient nuclear magnetic resonance (PFG-NMR)

Yaqing Wang <sup>†a</sup>, Wenjun Chen <sup>†a</sup>, Qi Zhao <sup>†b</sup>, Guizhen Jin <sup>†c</sup>, Zhimin Xue<sup>\* d</sup>, Yingxiong Wang<sup>\* b</sup>, and  
Tiancheng Mu<sup>\* a</sup>

a Department of Chemistry, Renmin University of China, Beijing 100872, China, E-mail:  
[tcmu@ruc.edu.cn](mailto:tcmu@ruc.edu.cn).

b Institute of Coal Chemistry, Chinese Academy of Science, Taiyuan 030001, (China, shanxi), E-mail:  
[wangyx@sxicc.ac.cn](mailto:wangyx@sxicc.ac.cn).

c Beijing Key Laboratory of Ionic Liquids Clean Process, CAS Key Laboratory of Green Process and Engineering, State Key Laboratory of Multiphase Complex Systems, Institute of Process Engineering, Chinese Academy of Sciences, Beijing 100190, China.

d Beijing Key Laboratory of Lignocellulosic Chemistry, College of Materials Science and Technology, Beijing Forestry University, Beijing 100083, China, E-mail: [zmxue@bjfu.edu.cn](mailto:zmxue@bjfu.edu.cn).

#### Table of the contents

1. Supplementary Figures
2. Supplementary Tables

## 1. Supplementary Figures

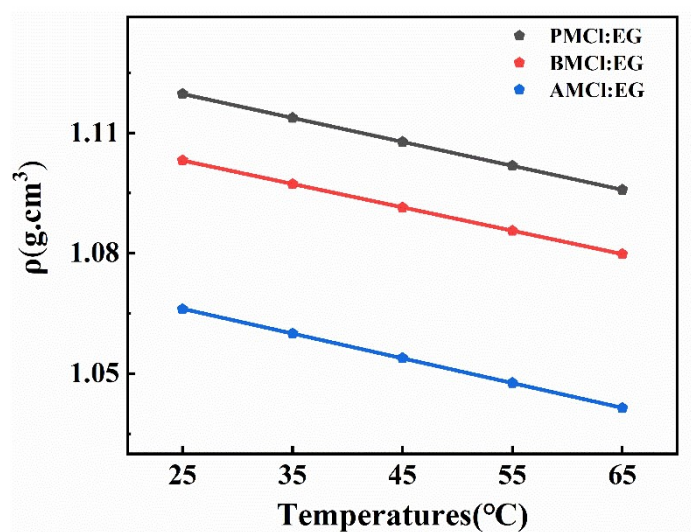

**Figure S1.** Density of the investigated DESs with different functional groups depending on temperature

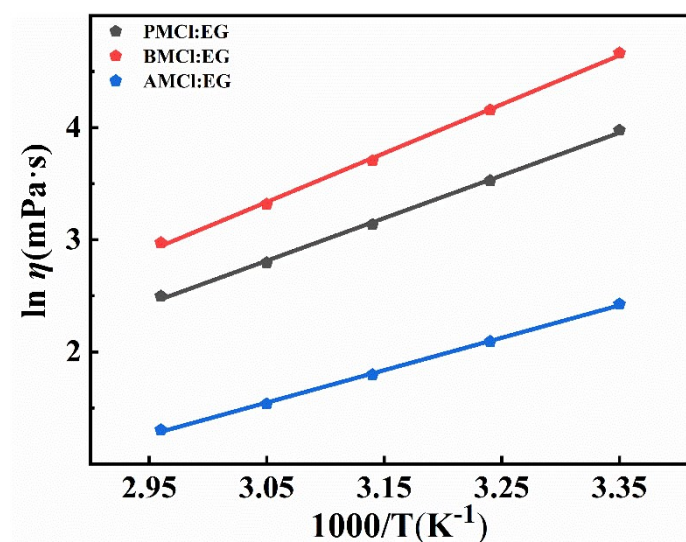

**Figure S2.** Viscosity of the investigated DESs with different functional groups depending on temperature

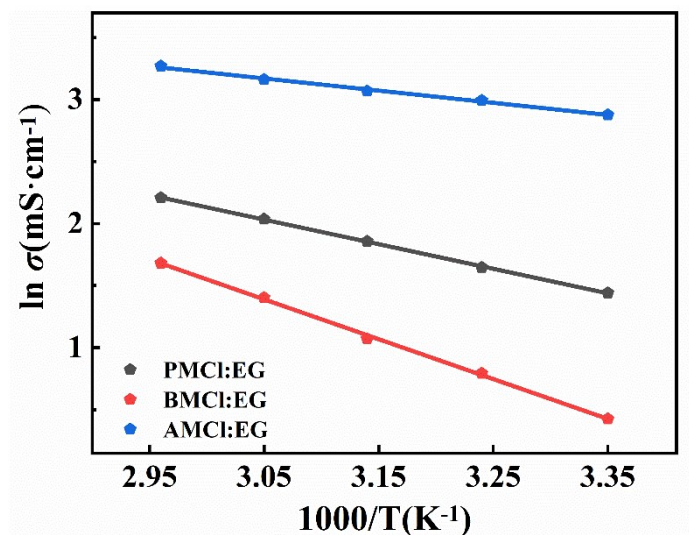

**Figure S3.** Conductivity of the investigated DESs with different functional groups depending on temperature

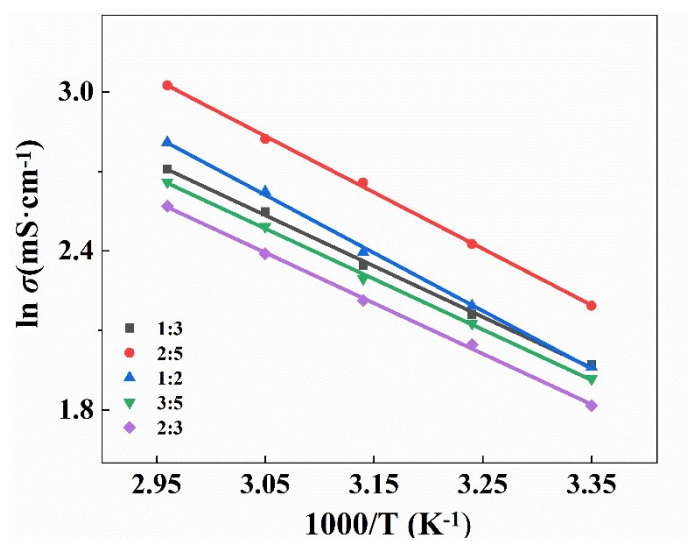

**Figure S4.** Conductivity of ChCl:EG with different molar ratio depending on temperature

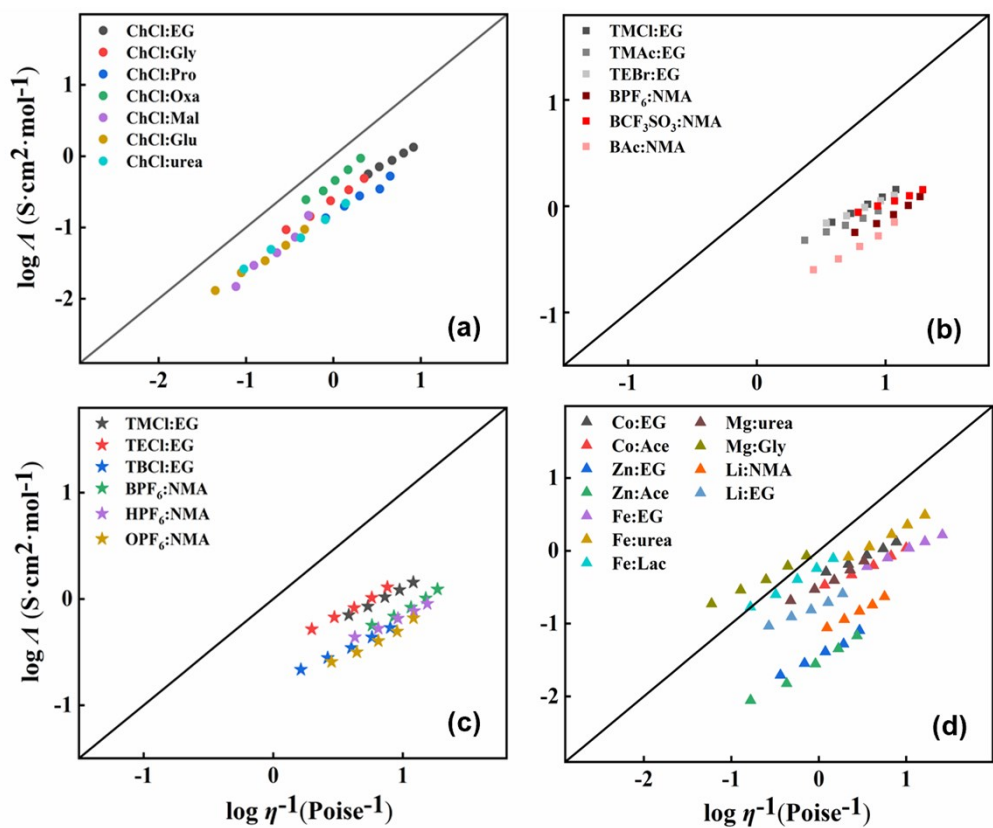

Figure

e S5. Ionicity of the investigated DESs depending on temperature (a) ChCl-based (b) with different alkyl chain lengths and (c) different anions (d) metal-based.

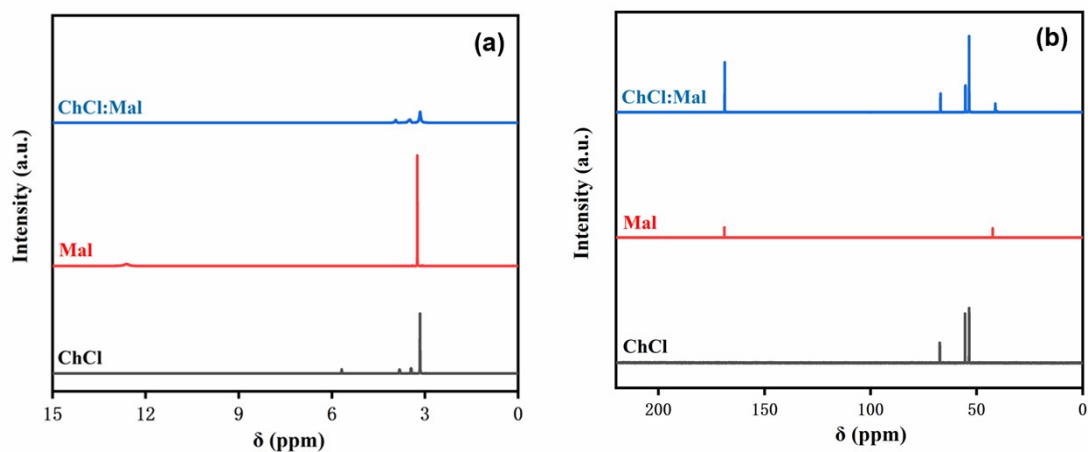

Figure S6.  $^1\text{H}$  NMR and  $^{13}\text{C}$  NMR spectra of pure ChCl, malonic acid and corresponding DES.

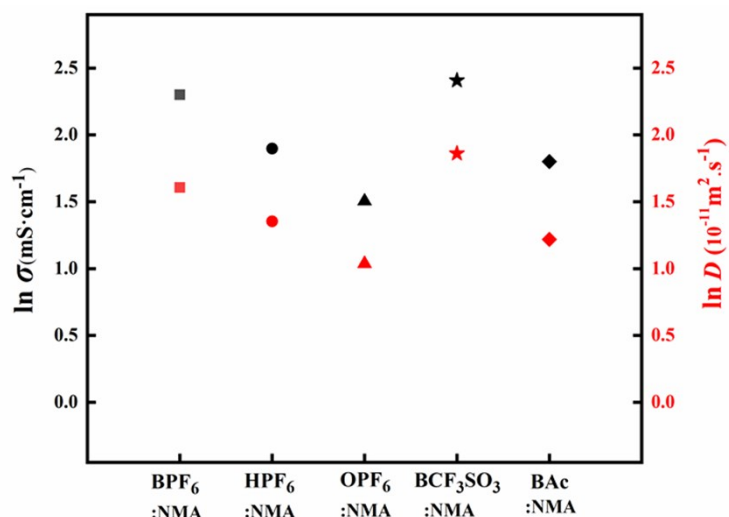

**Figure S7.** Relationship between diffusion coefficient and conductivity at room temperature.

## 2. Supplementary Tables

**Table S1.** General formula for the classification of DESs.

| type | general formula                                                                      | terms                           |
|------|--------------------------------------------------------------------------------------|---------------------------------|
| I    | $\text{Cat}^+\text{X}^- z\text{MCl}_x$                                               | M= Zn, Sn, Fe, Al               |
| II   | $\text{Cat}^+\text{X}^- z\text{MCl}_x \cdot y\text{H}_2\text{O}$                     | M= Cr, Co, Cu, Fe, Mg           |
| III  | $\text{Cat}^+\text{X}^- z\text{RZ}$                                                  | Z= CONH <sub>2</sub> , COOH, OH |
| IV   | $\text{MCl}_x + \text{RZ} = \text{MCl}_{x-1}^+ \cdot \text{RZ} + \text{MCl}_{x+1}^-$ | M= Al, Zn, Fe                   |

**Table S2.** Melting points of pure components and corresponding DESs

| DES                                   | melting point (°C) |     |     |
|---------------------------------------|--------------------|-----|-----|
|                                       | HBA                | HBD | DES |
| BPF <sub>6</sub> :NMA                 | 7                  | 28  | -11 |
| HPF <sub>6</sub> :NMA                 | -74                | 28  | -86 |
| OPF <sub>6</sub> :NMA                 | -70                | 28  | -88 |
| BCF <sub>3</sub> SO <sub>3</sub> :NMA | 16                 | 28  | -11 |
| BAc:NMA                               | -20                | 28  | -83 |
| LiTFSI:NMA                            | 234                | 28  | -72 |

**Table S3.** Ionicity of each investigated DES depending on temperature.

| DES                                   | % Ionicity |       |       |       |       |
|---------------------------------------|------------|-------|-------|-------|-------|
|                                       | 25 °C      | 35 °C | 45 °C | 55 °C | 65 °C |
| ChCl:EG                               | 22.4       | 21.2  | 18.6  | 17.3  | 16.1  |
| ChCl:Gly                              | 32.2       | 26.4  | 25.3  | 22.5  | 21.6  |
| ChCl:Pro                              | 16.6       | 14.9  | 13.8  | 10.2  | 11.7  |
| ChCl:Oxa                              | 50.3       | 42.6  | 43.4  | 43.7  | 45.3  |
| ChCl:Mal                              | 19.3       | 23.9  | 19.5  | 20.0  | 28.4  |
| ChCl:Glu                              | 29.2       | 26.3  | 20.6  | 19.6  | 20.0  |
| ChCl:urea                             | 27.5       | 25.5  | 16.9  | 16.0  | 15.7  |
| PMCl:EG                               | 19.8       | 15.6  | 13.1  | 11.2  | 9.9   |
| BMCl:EG                               | 15.3       | 13.3  | 11.2  | 10.7  | 10.1  |
| AMCl:EG                               | 16.3       | 13.2  | 10.6  | 9.0   | 8.1   |
| TMCl:EG                               | 18.5       | 15.9  | 14.3  | 12.9  | 11.9  |
| TECl:EG                               | 26.2       | 22.7  | 19.6  | 17.8  | 17.0  |
| TBCl:EG                               | 13.2       | 10.6  | 8.6   | 7.5   | 6.7   |
| BPF <sub>6</sub> :NMA                 | 10.4       | 8.3   | 7.4   | 6.8   | 6.6   |
| HPF <sub>6</sub> :NMA                 | 10.2       | 8.2   | 7.2   | 6.3   | 5.8   |
| OPF <sub>6</sub> :NMA                 | 9.1        | 7.2   | 6.2   | 5.5   | 5.5   |
| TMAc:EG                               | 20.3       | 16.5  | 13.5  | 11.5  | 10.3  |
| TEBr:EG                               | 19.9       | 16.2  | 14.1  | 12.3  | 10.8  |
| BCF <sub>3</sub> SO <sub>3</sub> :NMA | 14.3       | 11.6  | 9.5   | 8.2   | 7.4   |
| BAc:NMA                               | 9.1        | 7.4   | 6.6   | 6.0   | 6.0   |
| Co:EG                                 | 42.2       | 30.0  | 24.6  | 19.6  | 17.1  |
| Co:Ace                                | 28.9       | 19.6  | 14.9  | 12.6  | 10.9  |
| Zn:EG                                 | 5.4        | 4.1   | 3.5   | 2.7   | 2.8   |
| Zn:Ace                                | 5.3        | 3.5   | 3.0   | 2.7   | 2.5   |
| Fe:EG                                 | 17.1       | 13.0  | 10.1  | 8.1   | 6.4   |
| Fe:urea                               | 37.5       | 29.8  | 24.5  | 21.9  | 18.9  |
| Fe:Lac                                | 102.1      | 77.8  | 70.9  | 60.5  | 53.4  |
| Mg:urea                               | 43.4       | 33.0  | 26.1  | 23.9  | 22.0  |
| Mg:Gly                                | 313.9      | 225.8 | 160.6 | 138.7 | 116.9 |
| Li:NMA                                | 7.0        | 5.8   | 5.1   | 4.4   | 4.1   |
| Li:EG                                 | 34.4       | 25.4  | 18.9  | 15.3  | 13.7  |

Tables S4 and S5 below show the viscosity and conductivity data at different temperatures. For ChCl:malonic acid,  $\eta_0$  and  $\sigma_0$  data are from recent work (Gontrani et al., *ACS Sustainable Chem. Eng.*, 2019, 7, 12536),  $\eta_1$  and  $\sigma_1$  are measured by us.

As shown in Table S4, the viscosity data measured by us are larger than those of previous work. And then we strictly controlled the reaction temperature and water content of the solution, repeated the viscosity measurement experiment three times, and still got almost the same result. Our values are in good agreement with the density and viscosity data from *ACS Sustainable Chem. Eng.*, 2018, 6, 1039.

As shown in the  $^1\text{H}$  NMR spectra and  $^{13}\text{C}$  NMR spectra of the ChCl:malonic acid (Figure S6), there is no significant decarboxylation or other substances. The difference between this work and the above-mentioned literature value may be due to the measurement method.

For ChCl:Oxalic acid dehydrate,  $\eta_0$  and  $\sigma_0$  data are from recent work (*Phys. Chem. Chem. Phys.*, 2018, 20, 30120-30124),  $\eta_1$  and  $\sigma_1$  are measured by us. As shown in Table 2, the viscosity and conductivity data measured by us are very similar to the above-mentioned literature values.

**Table S4.** Viscosity and conductivity of ChCl:malonic acid ( $\eta_0$  and  $\sigma_0$  data are from Gontrani et al., *ACS Sustainable Chem. Eng.*, 2019, 7, 12536-12543,  $\eta_1$  and  $\sigma_1$  are measured by us.)

| $T$<br>°C | $\eta_0$<br>mPa·s | $\eta_1$<br>mPa·s | $\sigma_0$<br>mS·cm <sup>-1</sup> | $\sigma_1$<br>mS·cm <sup>-1</sup> |
|-----------|-------------------|-------------------|-----------------------------------|-----------------------------------|
| 25        | 660.3             | 1257.4            | 0.33                              | 0.23                              |
| 35        | 353.7             | 648.1             | 0.57                              | 0.44                              |
| 45        | 189.4             | 360.8             | 0.97                              | 0.68                              |
| 55        | 101.5             | 205.9             | 1.66                              | 1.13                              |

**Table S5.** Viscosity and conductivity of ChCl:Oxalic acid dihydrate ( $\eta_0$  and  $\sigma_0$  data are from *Phys. Chem. Chem. Phys.*, 2018, 20, 30120-30124;  $\eta_1$  and  $\sigma_1$  are measured by us.)

| $T$<br>°C | $\eta_0$<br>mPa·s | $\eta_1$<br>mPa·s | $\sigma_0$<br>mS·cm <sup>-1</sup> | $\sigma_1$<br>mS·cm <sup>-1</sup> |
|-----------|-------------------|-------------------|-----------------------------------|-----------------------------------|
| 25        | 82.9              | 95.02             | 5.60                              | 5.31                              |
| 35        | 52.8              | 62.31             | 8.11                              | 7.82                              |
| 45        | 43.6              | 42.27             | 11.46                             | 10.57                             |
| 55        | 23.3              | 29.39             | 15.86                             | 14.80                             |

65      16.1      19.86      21.53      20.76

**Table S6.** Diffusion coefficient of each component of the five DESs at room temperature.

| DES                                   | $D$ ( $10^{-11} \text{ m}^2 \cdot \text{s}^{-1}$ ) |       |      |
|---------------------------------------|----------------------------------------------------|-------|------|
|                                       | Cation                                             | Anion | HBD  |
| BPF <sub>6</sub> :NMA                 | 4.93                                               | 5.03  | 10.9 |
| HPF <sub>6</sub> :NMA                 | 3.67                                               | 4.08  | 8.66 |
| OPF <sub>6</sub> :NMA                 | 2.57                                               | 3.08  | 7.27 |
| BCF <sub>3</sub> SO <sub>3</sub> :NMA | 6.49                                               | 6.38  | 11.5 |
| BAC:NMA                               | 2.84                                               | 3.92  | 4.94 |
